# Supplementary material for: Tools for Assessing Cardiovascular Disease Risk Factors in Underserved Young Adult Populations: A Systematic Review
Source: MDPI journal article supplement (doi:10.3390/ijerph182413305), 2021-12-17
Supplement: s1 [file s1]

**Table S1.** Search strategy used in PubMed

|    |                                                                                             |           |
|----|---------------------------------------------------------------------------------------------|-----------|
|    | Cardiovascular Diseases                                                                     |           |
| 1  | cardiovascular disease*[tiab]                                                               | 158,869   |
| 2  | cardiovascular diseases[majr:noexp]                                                         | 95,167    |
| 3  | cardiovascular diseases[mh]                                                                 | 2,256,281 |
| 4  | cardiovascular diseases[mh:noexp]                                                           | 136,098   |
| 5  | myocardial infarction[majr]                                                                 | 124,856   |
| 6  | coronary disease[majr]                                                                      | 163,987   |
| 7  | stroke[majr]                                                                                | 89,288    |
| 8  | brain ischemia[majr:noexp]                                                                  | 37,147    |
| 9  | cerebrovascular accident[tiab]                                                              | 4,211     |
| 10 | death, sudden, cardiac[majr]                                                                | 9,124     |
| 11 | heart diseases[majr:noexp]                                                                  | 48,891    |
| 12 | cardiovascular mortality[tiab]                                                              | 12,184    |
| 13 | coronary[tiab]                                                                              | 378,233   |
| 14 | artery[tiab]                                                                                | 487,812   |
| 15 | disease[tiab]                                                                               | 2,867,168 |
| 16 | (#13) AND (#14 OR #15)                                                                      | 263,475   |
| 17 | stroke[tiab]                                                                                | 218,939   |
| 18 | brain[tiab]                                                                                 | 929,305   |
| 19 | cerebrovascular[tiab]                                                                       | 53,207    |
| 20 | cerebral[tiab]                                                                              | 344,308   |
| 21 | brainstem[tiab]                                                                             | 43,444    |
| 22 | (#17) AND (#18 OR #19 OR #20 OR #21)                                                        | 68,560    |
| 23 | intracranial hemorrhages[majr]                                                              | 47,765    |
| 24 | intracranial hemorrhage, traumatic[majr]                                                    | 9,136     |
| 25 | cerebral hemorrhages[majr]                                                                  | 21,291    |
| 26 | ((#23 NOT #24)) OR #25                                                                      | 39,587    |
| 27 | (#1 OR #2 OR #4 OR #5 OR #6 OR #7 OR #8 OR #9 OR #10 OR<br>#11 OR #12 OR #16 OR #22 OR #26) | 850,063   |
|    | Risk Assessment                                                                             |           |
| 28 | risk assessment[mh]                                                                         | 242,173   |
| 29 | Risk Assess*[tiab]                                                                          | 60,378    |
| 30 | Health Risk Assess*[tiab]                                                                   | 3,539     |
| 31 | Risk Function*[tiab]                                                                        | 607       |
| 32 | Risk Equation*[tiab]                                                                        | 583       |
| 33 | Risk Calc*[tiab]                                                                            | 1,981     |
| 34 | Risk Scor*[tiab]                                                                            | 17,789    |
| 35 | Risk Predict*[tiab]                                                                         | 9,746     |
| 36 | Risk Factor Calc*[tiab]                                                                     | 3         |
| 37 | Risk Factor Assess*[tiab]                                                                   | 785       |
| 38 | Risk Chart*[tiab]                                                                           | 223       |
| 39 | Risk Engine*[tiab]                                                                          | 161       |
| 40 | Risk Appraisal*[tiab]                                                                       | 652       |
| 41 | Prediction Model*[tiab]                                                                     | 14,171    |
| 42 | Risk algorithm[tiab]                                                                        | 233       |

|    |                                                                                                                                                                                                      |         |
|----|------------------------------------------------------------------------------------------------------------------------------------------------------------------------------------------------------|---------|
| 43 | Scoring* Method*[tiab]                                                                                                                                                                               | 43,976  |
| 44 | Scoring Scheme*[tiab]                                                                                                                                                                                | 789     |
| 45 | (#28 OR #29 OR #30 OR #31 OR #32 OR #33 OR #34 OR #35 OR<br>#36 OR #37 OR #38 OR #39 OR #40 OR #41 OR #42 OR #43 OR<br>#44)                                                                          | 346,361 |
|    | Coronary Artery Disease Risk Models                                                                                                                                                                  |         |
| 46 | assign score*[tiab]                                                                                                                                                                                  | 50      |
| 47 | brhs[tiab]                                                                                                                                                                                           | 26      |
| 48 | British regional heart[tiab]                                                                                                                                                                         | 143     |
| 49 | British national heart[tiab]                                                                                                                                                                         | 52      |
| 50 | busselton[tiab]                                                                                                                                                                                      | 247     |
| 51 | decode study[tiab]                                                                                                                                                                                   | 27      |
| 52 | Dundee risk score*[tiab]                                                                                                                                                                             | 4       |
| 53 | erica risk[tiab]                                                                                                                                                                                     | 229     |
| 54 | findris*[tiab]                                                                                                                                                                                       | 165     |
| 55 | framingham equation*[tiab]                                                                                                                                                                           | 205     |
| 56 | framingham estim*[tiab]                                                                                                                                                                              | 8       |
| 57 | framingham heart study algorithm[tiab]                                                                                                                                                               | 2       |
| 58 | Framingham algorithm[tiab]                                                                                                                                                                           | 49      |
| 59 | Framingham guideline*[tiab]                                                                                                                                                                          | 607     |
| 60 | Framingham risk[tiab]                                                                                                                                                                                | 2,622   |
| 61 | Framingham score*[tiab]                                                                                                                                                                              | 402     |
| 62 | Framingham function*[tiab]                                                                                                                                                                           | 52      |
| 63 | Framingham model*[tiab]                                                                                                                                                                              | 98      |
| 64 | Glostrup[tiab]                                                                                                                                                                                       | 327     |
| 65 | New Zealand chart*[tiab]                                                                                                                                                                             | 515     |
| 66 | precord[tiab]                                                                                                                                                                                        | 5       |
| 67 | PROCAM[tiab]                                                                                                                                                                                         | 233     |
| 68 | Reynolds risk score*[tiab]                                                                                                                                                                           | 68      |
| 69 | score project[tiab]                                                                                                                                                                                  | 56      |
| 70 | Sheffield table*[tiab]                                                                                                                                                                               | 34      |
| 71 | shaper score*[tiab]                                                                                                                                                                                  | 21      |
| 72 | Systematic Coronary Risk Evaluation[tiab]                                                                                                                                                            | 296     |
| 73 | (#46 OR #47 OR #48 OR #49 OR #50 OR #51 OR #52 OR #53 OR<br>#54 OR #55 OR #56 OR #57 OR #58 OR #59 OR #60 OR #61 OR<br>#62 OR #63 OR #64 OR #65 OR #66 OR #67 OR #68 OR #69 OR<br>#70 OR #71 OR #72) | 5,706   |
|    | Tools                                                                                                                                                                                                |         |
| 74 | (surveys and questionnaires[majr:noexp])                                                                                                                                                             | 42,079  |
| 75 | patient reported outcome measures[majr:noexp]                                                                                                                                                        | 1,630   |
| 76 | health care surveys[majr:noexp]                                                                                                                                                                      | 3,808   |
| 77 | survey tools[tiab]                                                                                                                                                                                   | 201     |
| 78 | survey instrument*[tiab]                                                                                                                                                                             | 3,760   |
| 79 | community surveys[majr:noexp]                                                                                                                                                                        | 42,079  |
| 80 | ("surveys and questionnaires"[tiab])                                                                                                                                                                 | 889     |
| 81 | (#74 NOT #80)                                                                                                                                                                                        | 42,027  |
| 82 | outcome measure*[tiab]                                                                                                                                                                               | 207,525 |
| 83 | outcome assessments[tiab]                                                                                                                                                                            | 1,121   |

|     |                                                                                               |         |
|-----|-----------------------------------------------------------------------------------------------|---------|
| 84  | (#75 OR #76 OR #77 OR #78 OR #81 OR #82 OR #83)                                               | 256,161 |
|     | Underserved populations                                                                       |         |
| 85  | vulnerable populations[majr:noexp]                                                            | 4,132   |
| 86  | medically underserved area*[majr:noexp]                                                       | 3,189   |
| 87  | disadvantaged populations[tiab]                                                               | 851     |
| 88  | (underserved[tiab]) AND (patients OR populations[tiab])                                       | 4,624   |
| 89  | sensitive population*[tiab]                                                                   | 537     |
| 90  | sensitive population group*[tiab]                                                             | 17      |
| 91  | medically underserved population*[tiab]                                                       | 246     |
| 92  | (#86 OR #91)                                                                                  | 3,377   |
| 93  | (#89 OR #90)                                                                                  | 537     |
| 94  | (limited) AND health resource*[mh]                                                            | 1,670   |
| 95  | (#85 OR #87 OR #88 OR #92 OR #93 OR #94)                                                      | 14,124  |
|     | Summation                                                                                     |         |
| 96  | (#45 AND #84 AND #73)                                                                         | 149     |
| 97  | (#27 AND #96 AND English[la] AND humans[mh] AND young adult*[mh] AND 2008:2019[dp])           | 5       |
| 98  | (#27 AND #96 AND English[la] AND humans[mh] AND #95 AND 2008:2019[dp])                        | 0       |
| 99  | (#27 AND #96 AND English[la] AND humans[mh] AND young adult*[mh] AND #95 AND 2008:2019[dp])   | 0       |
| 100 | (#27 AND #96 AND English[la] AND humans[mh] OR young adult*[mh] AND #95 AND 2008:2019[dp])    | 1,126   |
| 101 | (#27 AND #96 AND English[la] AND humans[mh] AND young adult*[tiab] AND 2008:2019[dp])         | 1       |
| 102 | (#27 AND #96 AND English[la] AND humans[mh] OR young adult*[tiab] AND #95 AND 2008:2019[dp])  | 59      |
| 103 | (#45 OR #84 OR #73)                                                                           | 594,736 |
| 104 | (#27 AND #103 AND English[la] AND humans[mh] AND young adult*[mh] AND 2008:2019[dp])          | 2,934   |
| 105 | (#27 AND #103 AND English[la] AND humans[mh] AND #95 AND 2008:2019[dp])                       | 43      |
| 106 | (#27 AND #103 AND English[la] AND humans[mh] AND young adult*[mh] AND #95 AND 2008:2019[dp])  | 2       |
| 107 | (#27 AND #103 AND English[la] AND humans[mh] OR young adult*[mh] AND #95 AND 2008:2019[dp])   | 1,167   |
| 108 | (#27 AND #103 AND English[la] AND humans[mh] AND young adult*[tiab] AND 2008:2019[dp])        | 365     |
| 109 | (#27 AND #103 AND English[la] AND humans[mh] OR young adult*[tiab] AND #95 AND 2008:2019[dp]) | 102     |
| 110 | ((#45 AND #84)) OR #73                                                                        | 15,915  |
| 111 | (#27 AND #110 AND English[la] AND humans[mh] AND young adult*[mh] AND 2008:2019[dp])          | 298     |
| 112 | (#27 AND #110 AND English[la] AND humans[mh] AND #95 AND 2008:2019[dp])                       | 6       |
| 113 | (#27 AND #110 AND English[la] AND humans[mh] AND young adult*[mh] AND #95 AND 2008:2019[dp])  | 0       |

|     |                                                                                               |                                                  |
|-----|-----------------------------------------------------------------------------------------------|--------------------------------------------------|
| 114 | (#27 AND #110 AND English[la] AND humans[mh] OR young adult*[mh] AND #95 AND 2008:2019[dp])   | 1,132                                            |
| 115 | (#27 AND #110 AND English[la] AND humans[mh] AND young adult*[tiab] AND 2008:2019[dp])        | 33                                               |
| 116 | (#27 AND #110 AND English[la] AND humans[mh] OR young adult*[tiab] AND #95 AND 2008:2019[dp]) | 65                                               |
|     | Tools in young adults (SR research question 1)                                                |                                                  |
| 117 | #97 OR #101 OR #104 OR #108 OR #111 OR #115                                                   | 3,108                                            |
| 118 | #117 AND letter[pt]                                                                           | 23                                               |
| 119 | #117 AND comment[pt]                                                                          | 17                                               |
| 120 | #117 AND editorial[pt]                                                                        | 14                                               |
| 121 | #118 OR #119 OR #120                                                                          | 42                                               |
| 122 | #117 NOT #121                                                                                 | 3,066 (3,110 as at 5/28/19; 3,121 as at 5/29/19) |
|     | Tools for underserved young adults (SR research question 2)                                   |                                                  |
| 123 | #100 OR #102 OR #105 OR #106 OR #107 OR #109 OR #112 OR #114 OR #116                          | 1,188                                            |
| 124 | #123 AND letter[pt]                                                                           | 5                                                |
| 125 | #123 AND comment[pt]                                                                          | 0                                                |
| 126 | #123 AND editorial[pt]                                                                        | 2                                                |
| 127 | #124 OR #125 OR #126                                                                          | 7                                                |
| 128 | #123 NOT #127                                                                                 | 1,181                                            |

AutoSave Off Data Extraction Template\_RQ1 - Saved Audrey Opoku-Acheampong

File Home Insert Page Layout Formulas Data Review View Help ACROBAT

Clipboard Font Alignment Number Styles Cells Editing Analysis Sensitivity

Calibri 12 A<sup>+</sup> A<sup>-</sup> B I U Wrap Text General

Conditional Formatting Format as Table Cell Styles Insert Delete Format AutoSum Fill Sort & Find & Filter Select Analyze Data Sensitivity

N7

|   | C          | D                    | E         | F                 | G                           | H           | I             | J      | K              | L                  | M                 | N                     | O                                         | P             | Q              | R                                       | S                 | T                                             | U                      | V                                                                           | W                             | X                                                           |
|---|------------|----------------------|-----------|-------------------|-----------------------------|-------------|---------------|--------|----------------|--------------------|-------------------|-----------------------|-------------------------------------------|---------------|----------------|-----------------------------------------|-------------------|-----------------------------------------------|------------------------|-----------------------------------------------------------------------------|-------------------------------|-------------------------------------------------------------|
| 1 | Author(s): | Date of publication: | Citation: | Study population: | Study aim(s) & objective(s) | Sample size | Age range (y) | Gender | Race/Ethnicity | SES (if specified) | Country of origin | Other Characteristics | Setting (incl. city, state, country & v & | Type of Study | Study duration | Experimental conditions (if applicable) | No. of study arms | Description of intervention(s) & comparators: | Main outcome measures: | Was a survey or assessment tool developed and/or validated specifically for | Risk assessment measure/ tool | Assessment based on clinical factors, non clinical or both? |
| 2 |            |                      |           |                   |                             |             |               |        |                |                    |                   |                       |                                           |               |                |                                         |                   |                                               |                        |                                                                             |                               |                                                             |
| 4 |            |                      |           |                   |                             |             |               |        |                |                    |                   |                       |                                           |               |                |                                         |                   |                                               |                        |                                                                             |                               |                                                             |
| 5 |            |                      |           |                   |                             |             |               |        |                |                    |                   |                       |                                           |               |                |                                         |                   |                                               |                        |                                                                             |                               |                                                             |
| 6 |            |                      |           |                   |                             |             |               |        |                |                    |                   |                       |                                           |               |                |                                         |                   |                                               |                        |                                                                             |                               |                                                             |
| 7 |            |                      |           |                   |                             |             |               |        |                |                    |                   |                       |                                           |               |                |                                         |                   |                                               |                        |                                                                             |                               |                                                             |
| 8 |            |                      |           |                   |                             |             |               |        |                |                    |                   |                       |                                           |               |                |                                         |                   |                                               |                        |                                                                             |                               |                                                             |

Sheet3 Short\_form Form sample Charts Sheet1

Ready Type here to search 68°F Sunny 5:29 AM 10/20/2021

**Figure S1.** Sample of data extraction form used.
